# Supplementary material for: circFAM120B functions as a tumor suppressor in esophageal squamous cell carcinoma via the miR-661/PPM1L axis and the PKR/p38 MAPK/EMT pathway
Source: PubMed Central journal article supplement (PMC9016076; doi:10.1038/s41419-022-04818-5), 2022-04-18

**A**

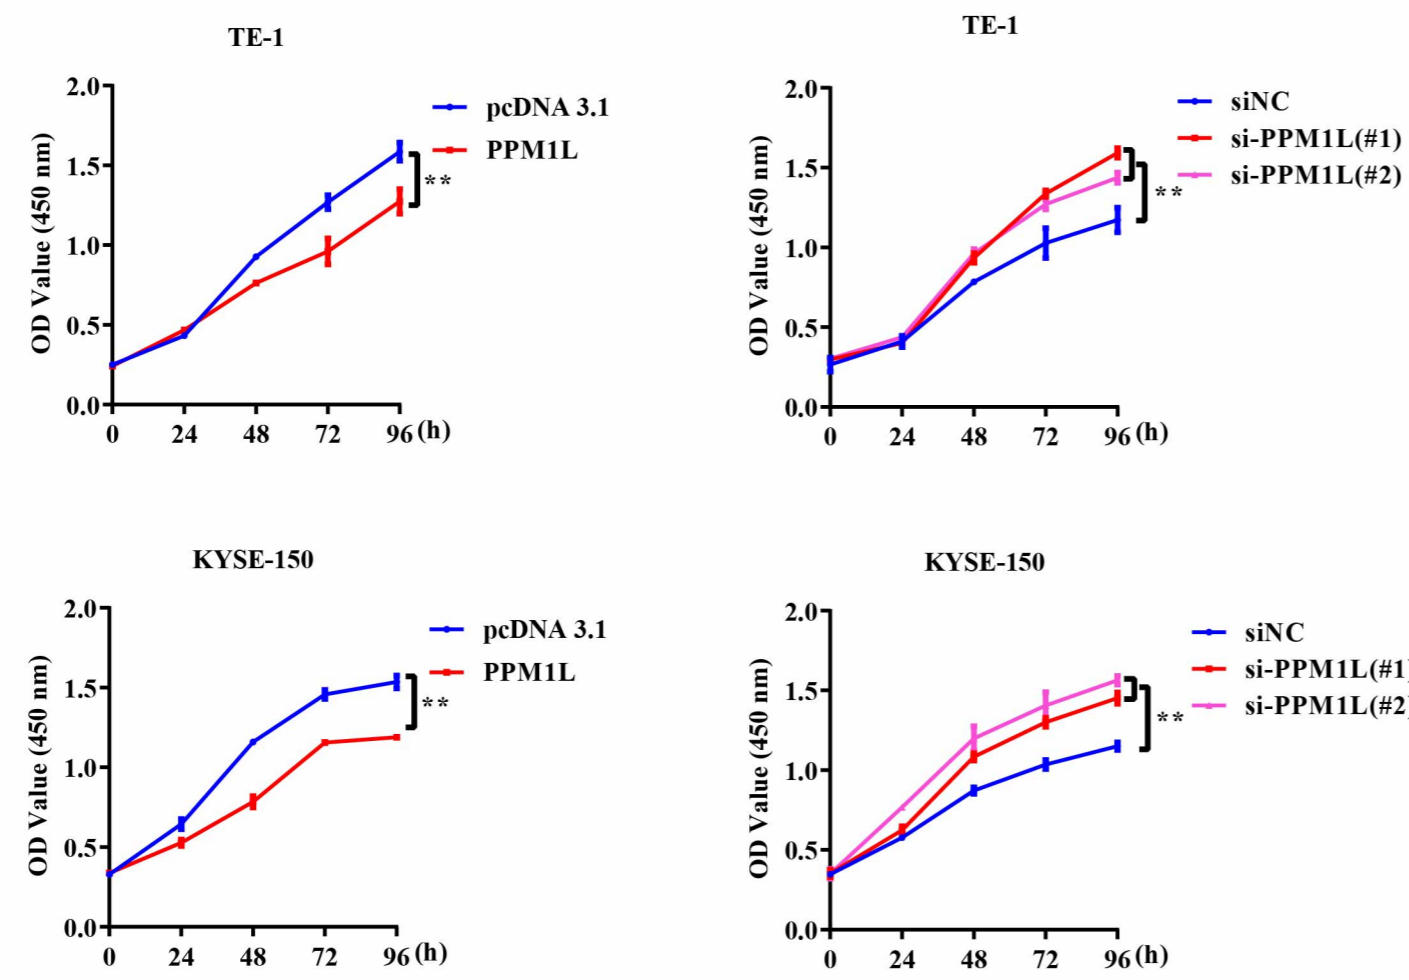

**B**

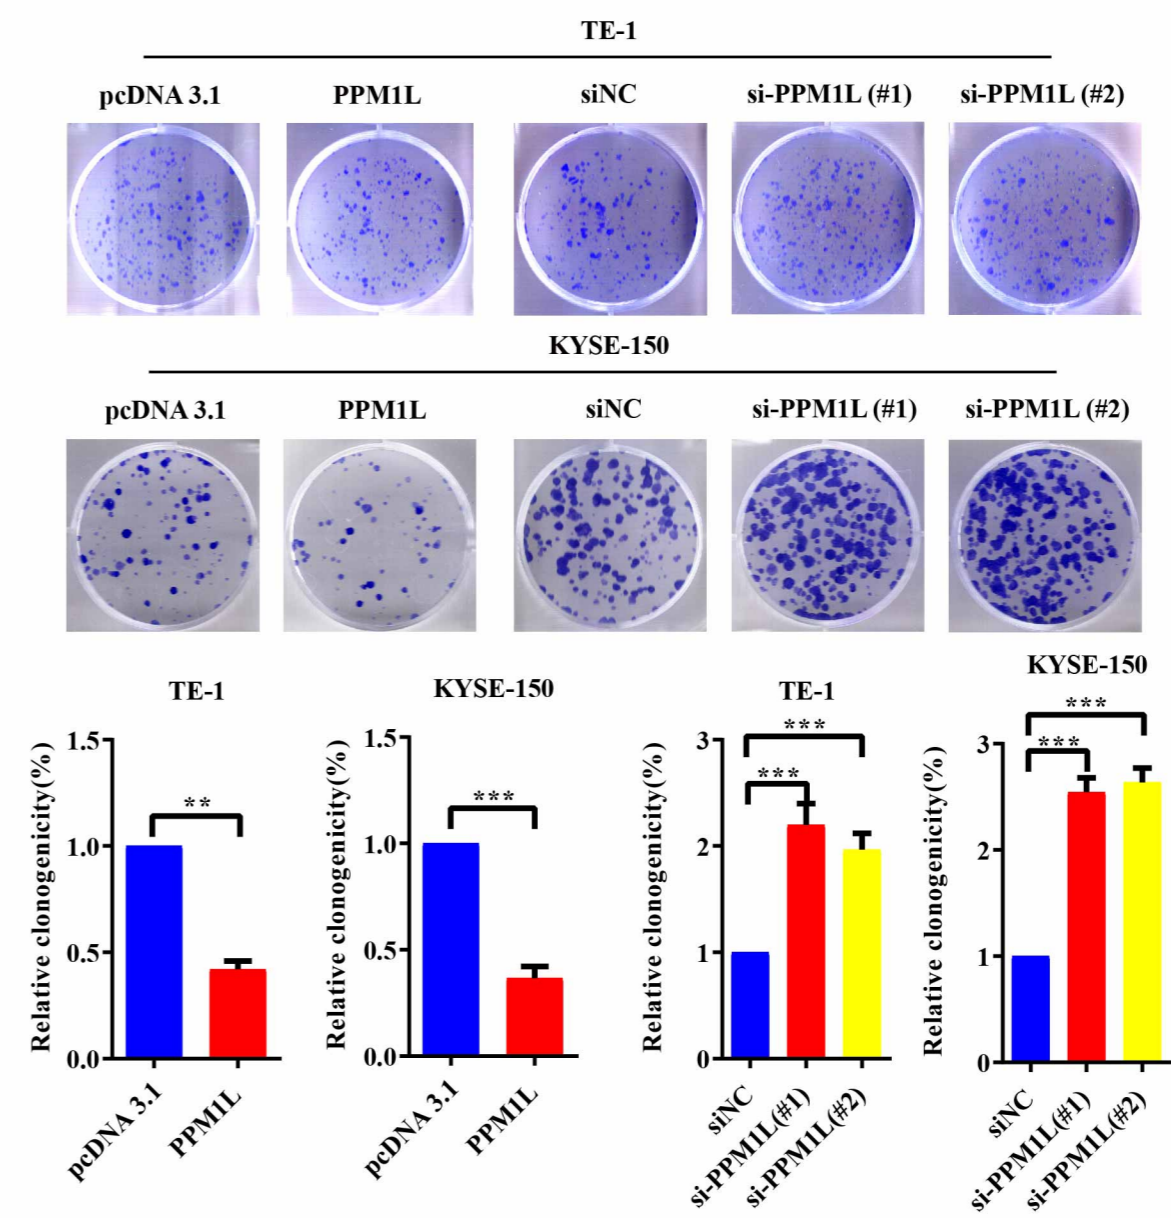

**C**

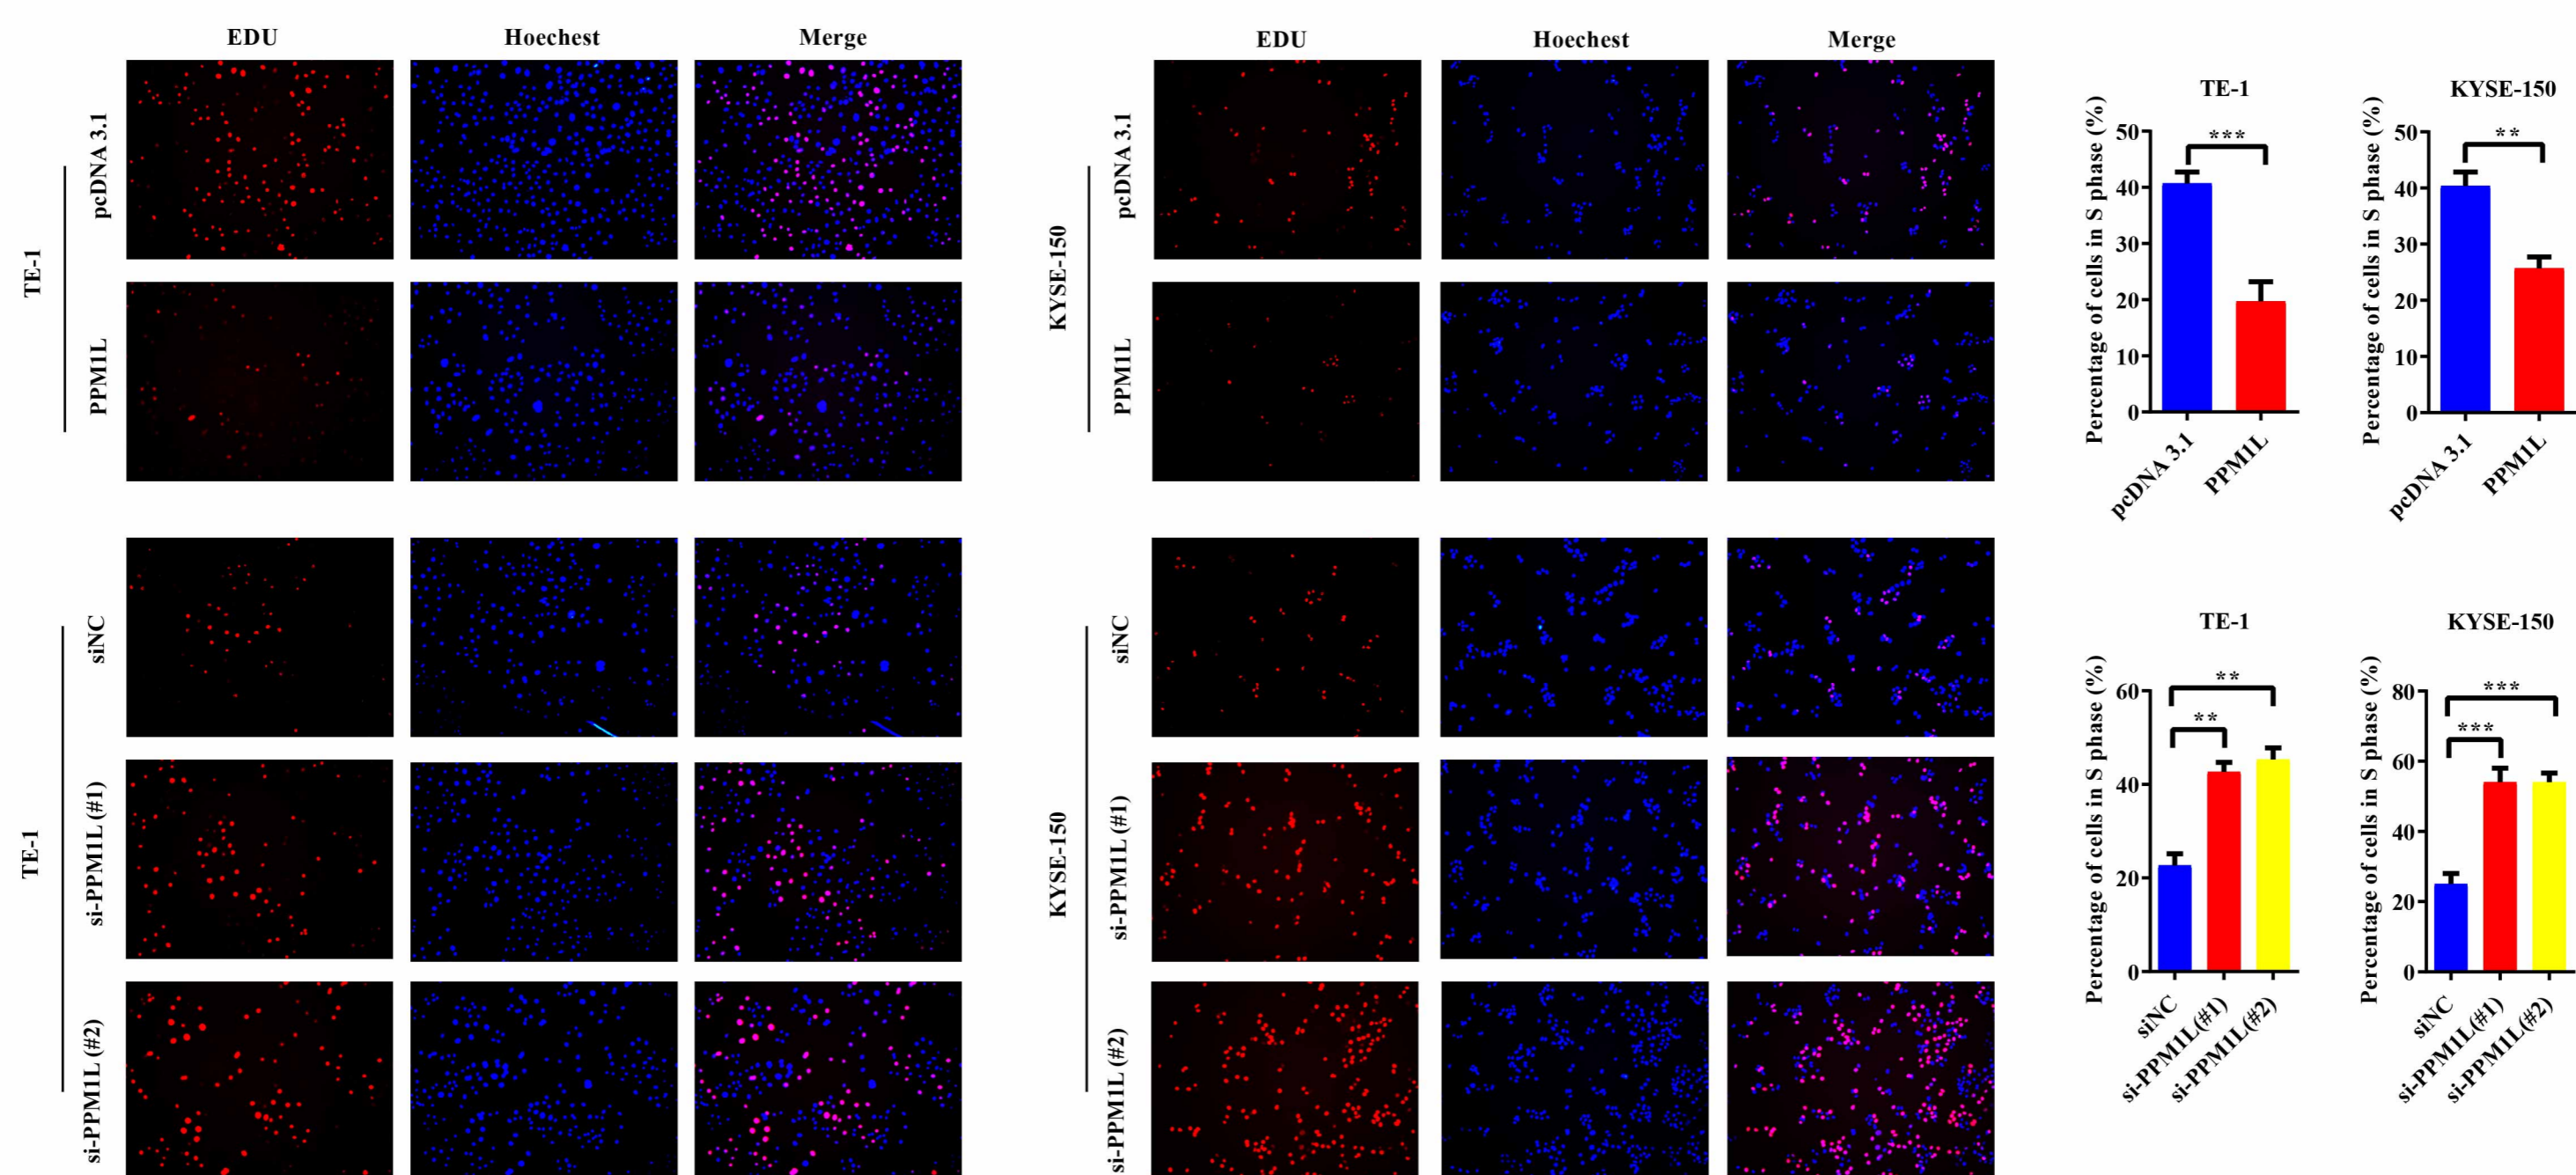

**D**

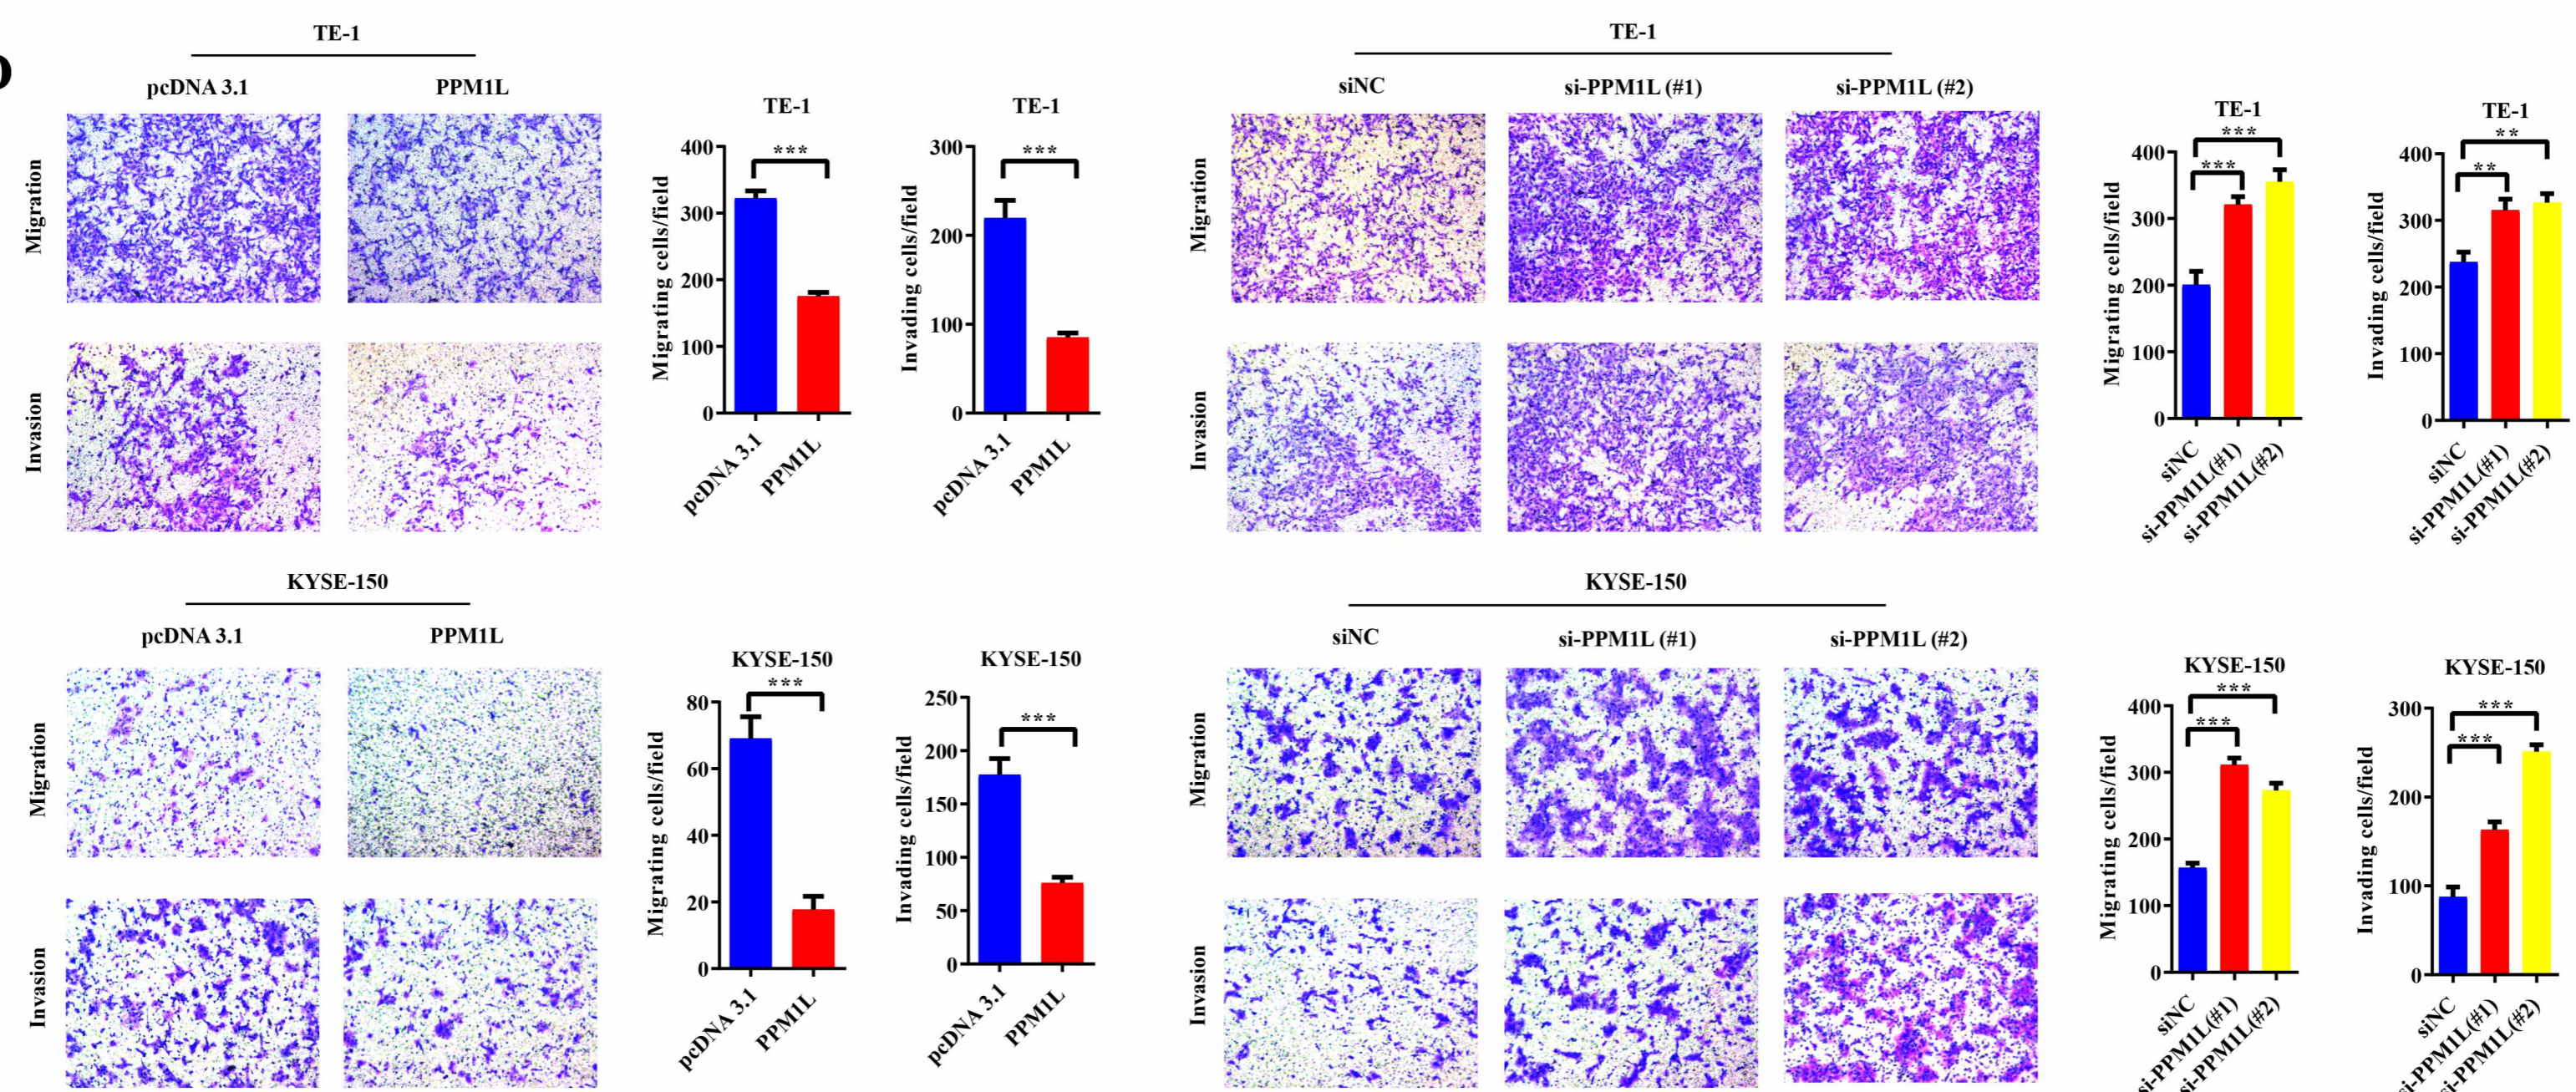

Supplement: 41419_2022_4818_MOESM4_ESM.pdf [file 41419_2022_4818_MOESM4_ESM.pdf]
